# Supplementary material
Source: PubMed Central journal article supplement (PMC3680344)
Supplement: NIHMS359881-supplement-Table_1.pdf [file NIHMS359881-supplement-Table_1.pdf]

Table SI. Tumor eradication requires perforin expression by the NK cells and IL-15R $\alpha$  expression by the host cells

| Tumor <sup>a</sup> | Host mouse                                                                | Eradication <sup>b</sup> |
|--------------------|---------------------------------------------------------------------------|--------------------------|
| M-control          | <i>Rag1</i> <sup>-/-</sup>                                                | 0/8                      |
| M-IL15             | <i>Rag1</i> <sup>-/-</sup>                                                | 6/7*                     |
|                    | anti-NK1.1 treated <i>Rag1</i> <sup>-/-</sup>                             | 0/7                      |
|                    | <i>Rag1</i> <sup>-/-</sup> <i>prf</i> <sup>-/-</sup>                      | 0/8 <sup>c</sup>         |
|                    | <i>Rag1</i> <sup>-/-</sup> <i>IL15R<math>\alpha</math></i> <sup>-/-</sup> | 1/6 <sup>d**</sup>       |

<sup>a</sup>Anti-IL15 antibody allowed M-IL15 tumors to grow to an average size of 1086 mm<sup>3</sup> before regression. <sup>b</sup>Data are pooled from at least three independent experiments for each group. Representative growth curves can be found within the figures. Data include <sup>c</sup> two or <sup>d</sup> three mice not treated with anti-IL15. \*p<0.002 compared to M-control. Not included are eight additional mice with tumors that regressed substantially but full eradication was not verified due to sacrifice. \*\*p<0.03 compared to M-IL15 in *Rag1*<sup>-/-</sup>.
