# Supplementary material
Source: PubMed Central journal article supplement (PMC3680344)

# Supplementary Fig. S1

A

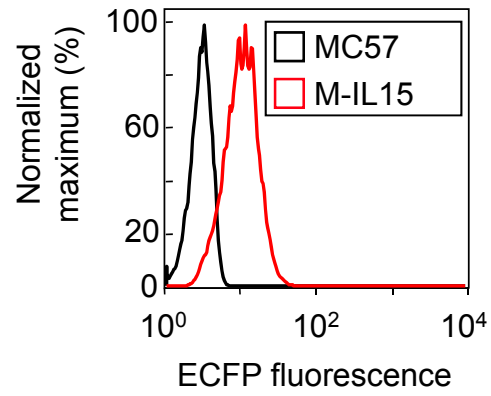

B

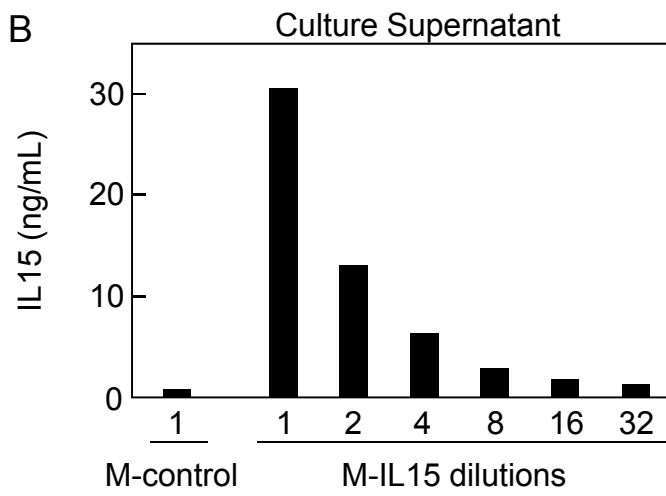

Supplement: NIHMS359881-supplement-Figure_1.pdf [file NIHMS359881-supplement-Figure_1.pdf]

# Supplementary Fig. S2

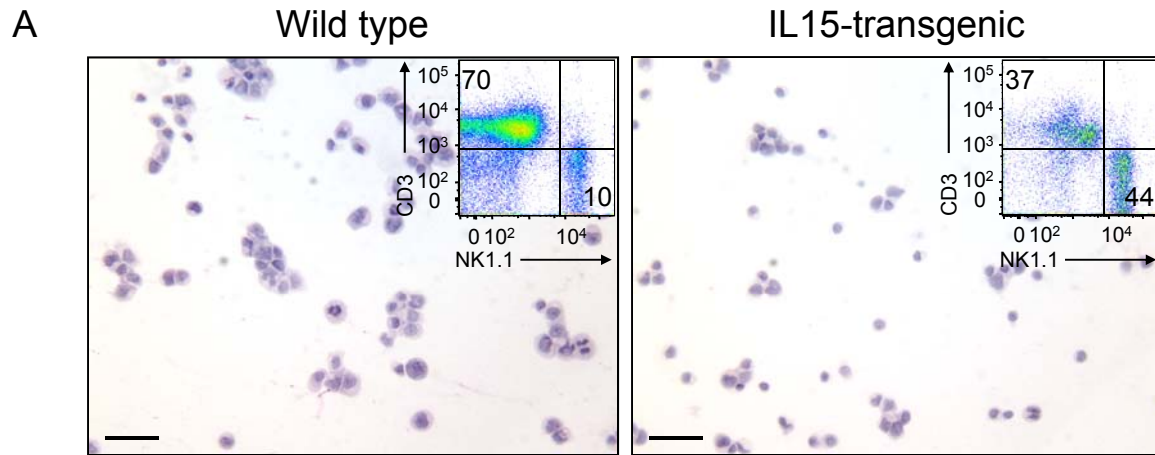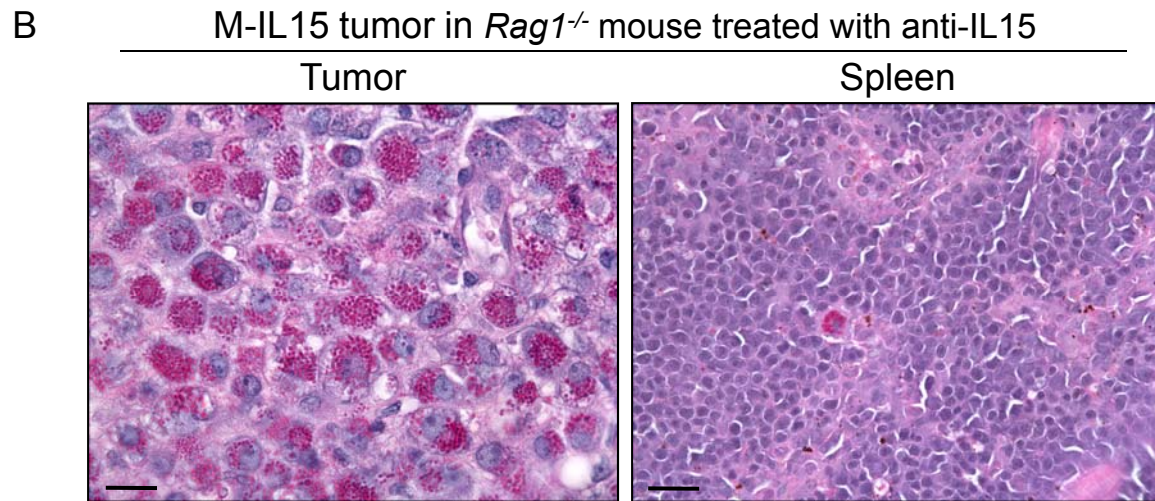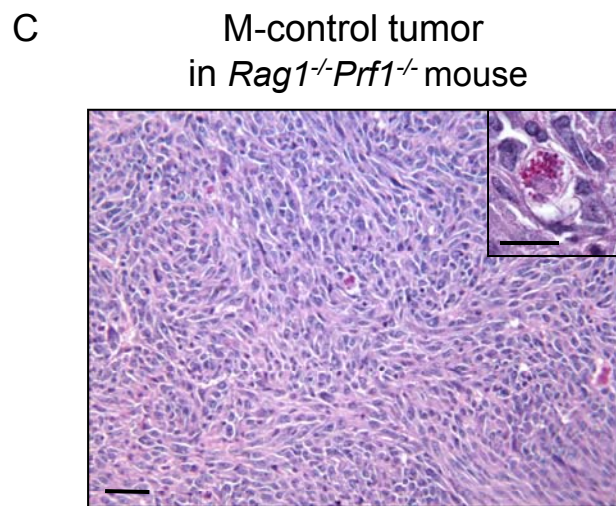

Supplement: NIHMS359881-supplement-Figure_2.pdf [file NIHMS359881-supplement-Figure_2.pdf]

# Supplementary Fig. S3

M-IL15 tumor after injection in *Rag1<sup>-/-</sup>Prf1<sup>-/-</sup>*

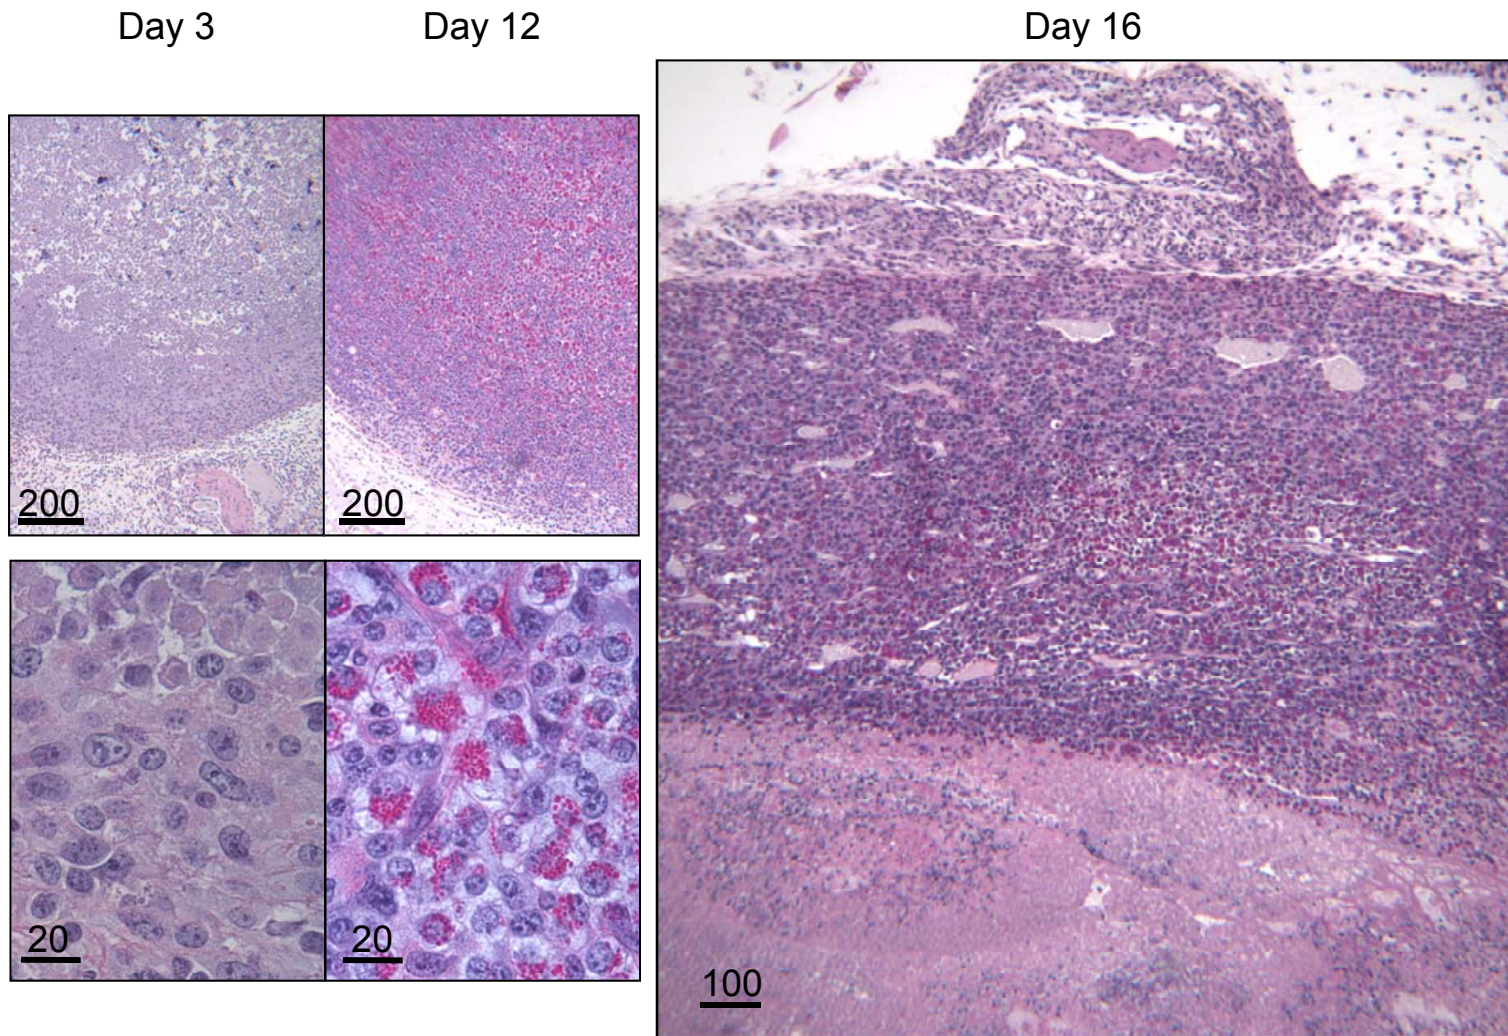

Supplement: NIHMS359881-supplement-Figure_3.pdf [file NIHMS359881-supplement-Figure_3.pdf]

# Supplementary Fig. S4

**A**

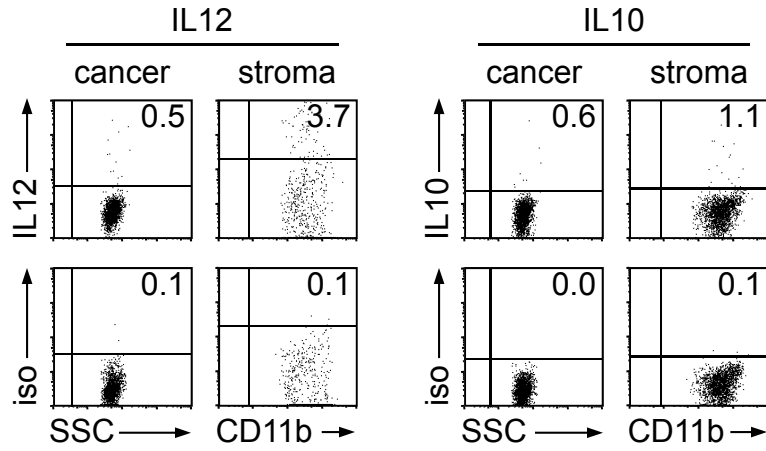

**B**

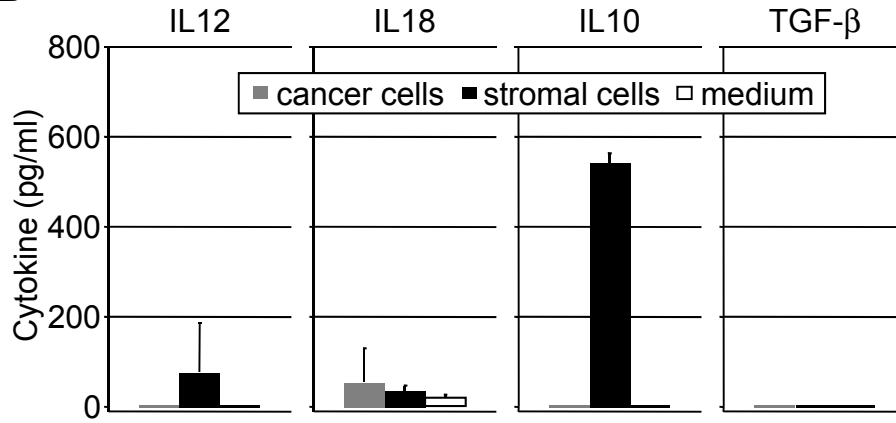

Supplement: NIHMS359881-supplement-Figure_4.pdf [file NIHMS359881-supplement-Figure_4.pdf]

# Supplementary Fig. S5

A

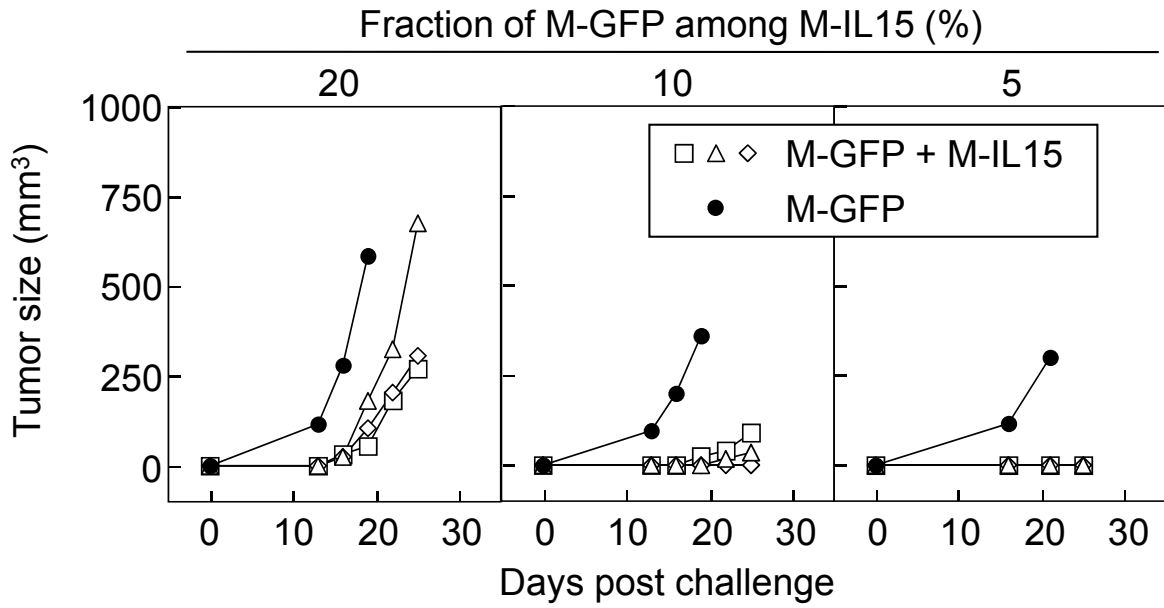

B

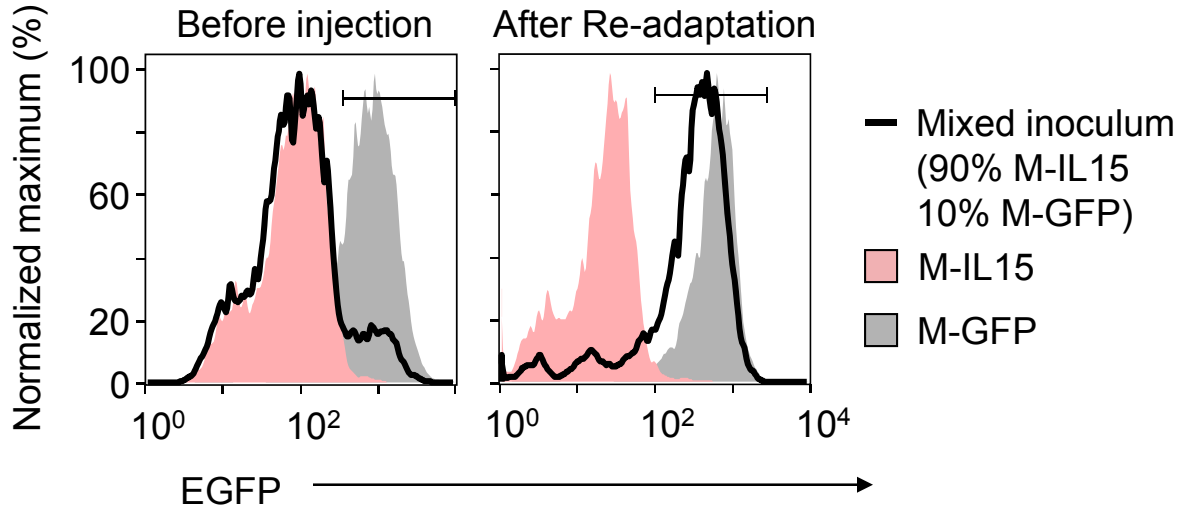

Supplement: NIHMS359881-supplement-Figure_5.pdf [file NIHMS359881-supplement-Figure_5.pdf]

# Supplementary Fig. S6

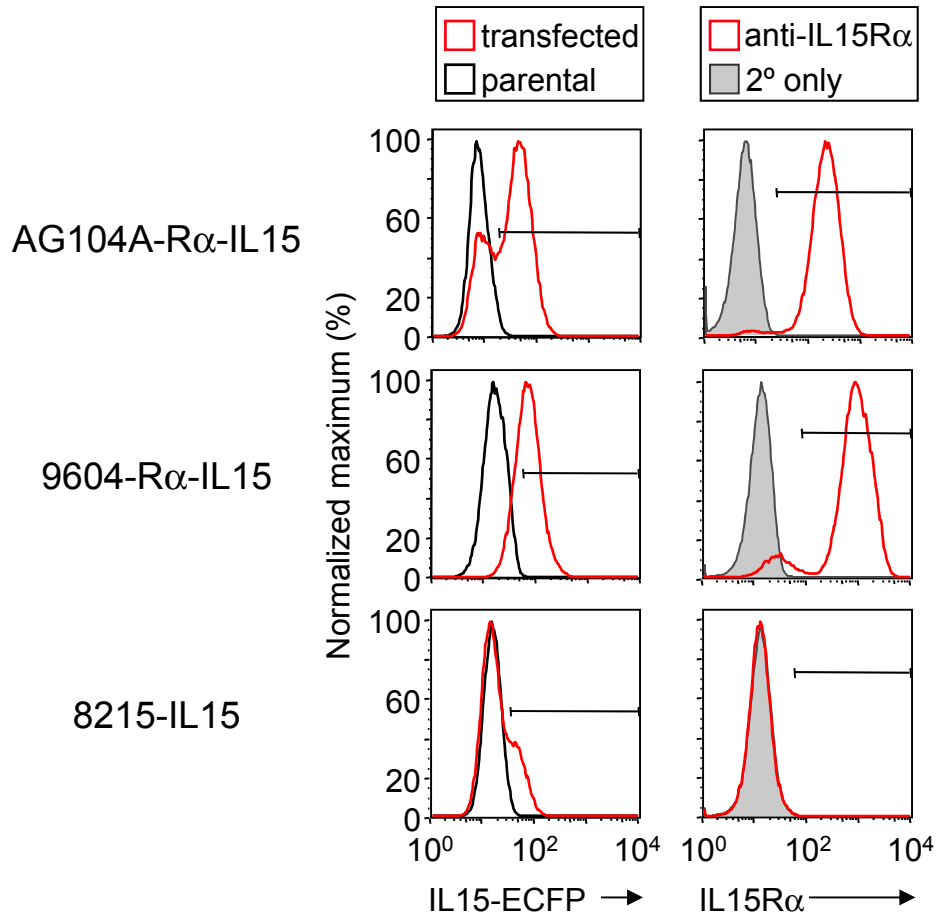

Supplement: NIHMS359881-supplement-Figure_6.pdf [file NIHMS359881-supplement-Figure_6.pdf]
